# Supplementary material
Source: MDPI journal article supplement (https://www.mdpi.com/2076-3298/9/10/124)
Supplement: s1 [file s1]

## Article

# Application of Headspace-SIFT-MS to Direct Analysis of Hazardous Volatiles in Drinking Water

Mark J. Perkins <sup>1</sup> and Vaughan S. Langford <sup>2,\*</sup>

<sup>1</sup> Element Materials Technology Laboratory Instrumentation, Wellbrook Court, Girton Rd, Girton, Cambridge CB3 0NA UK

<sup>2</sup> Syft Technologies Limited, 68 Saint Asaph Street, Christchurch Central City, Christchurch 8011 New Zealand

\* Correspondence: vaughan.langford@syft.com

## Table of Contents

### 1. Supplementary Figures

Figure S1: Linearity of the BTEX compounds.

Figure S2: Linearity of individual quantitation ions of the THM compounds.

### 2. Supplementary Tables

Table S1: Linearity data for the BTEX compounds.

Table S2: Linearity data for the individual quantitation ions of the THM compounds.

Table S3: Limit of quantitation data for the BTEX compounds.

Table S4: Limit of quantitation data for the individual quantitation ions of the THMs.

Table S5: Precision data for the BTEX compounds.

Table S6: Precision data for the individual quantitation ions of the THMs.

Table S7: Measured BTEX concentrations in a drinking water sample.

Table S8: Measured THM concentrations ( individual quantitation ions) in a drinking water sample

Table S9: Accuracy data for BTEX compounds.

Table S10: Accuracy data for the individual quantitation ions of the THMs.

Table S11: Recovery data for BTEX compounds

Table S12: Recovery data for the individual quantitation ions of the THMs.

## 1. Supplementary Figures

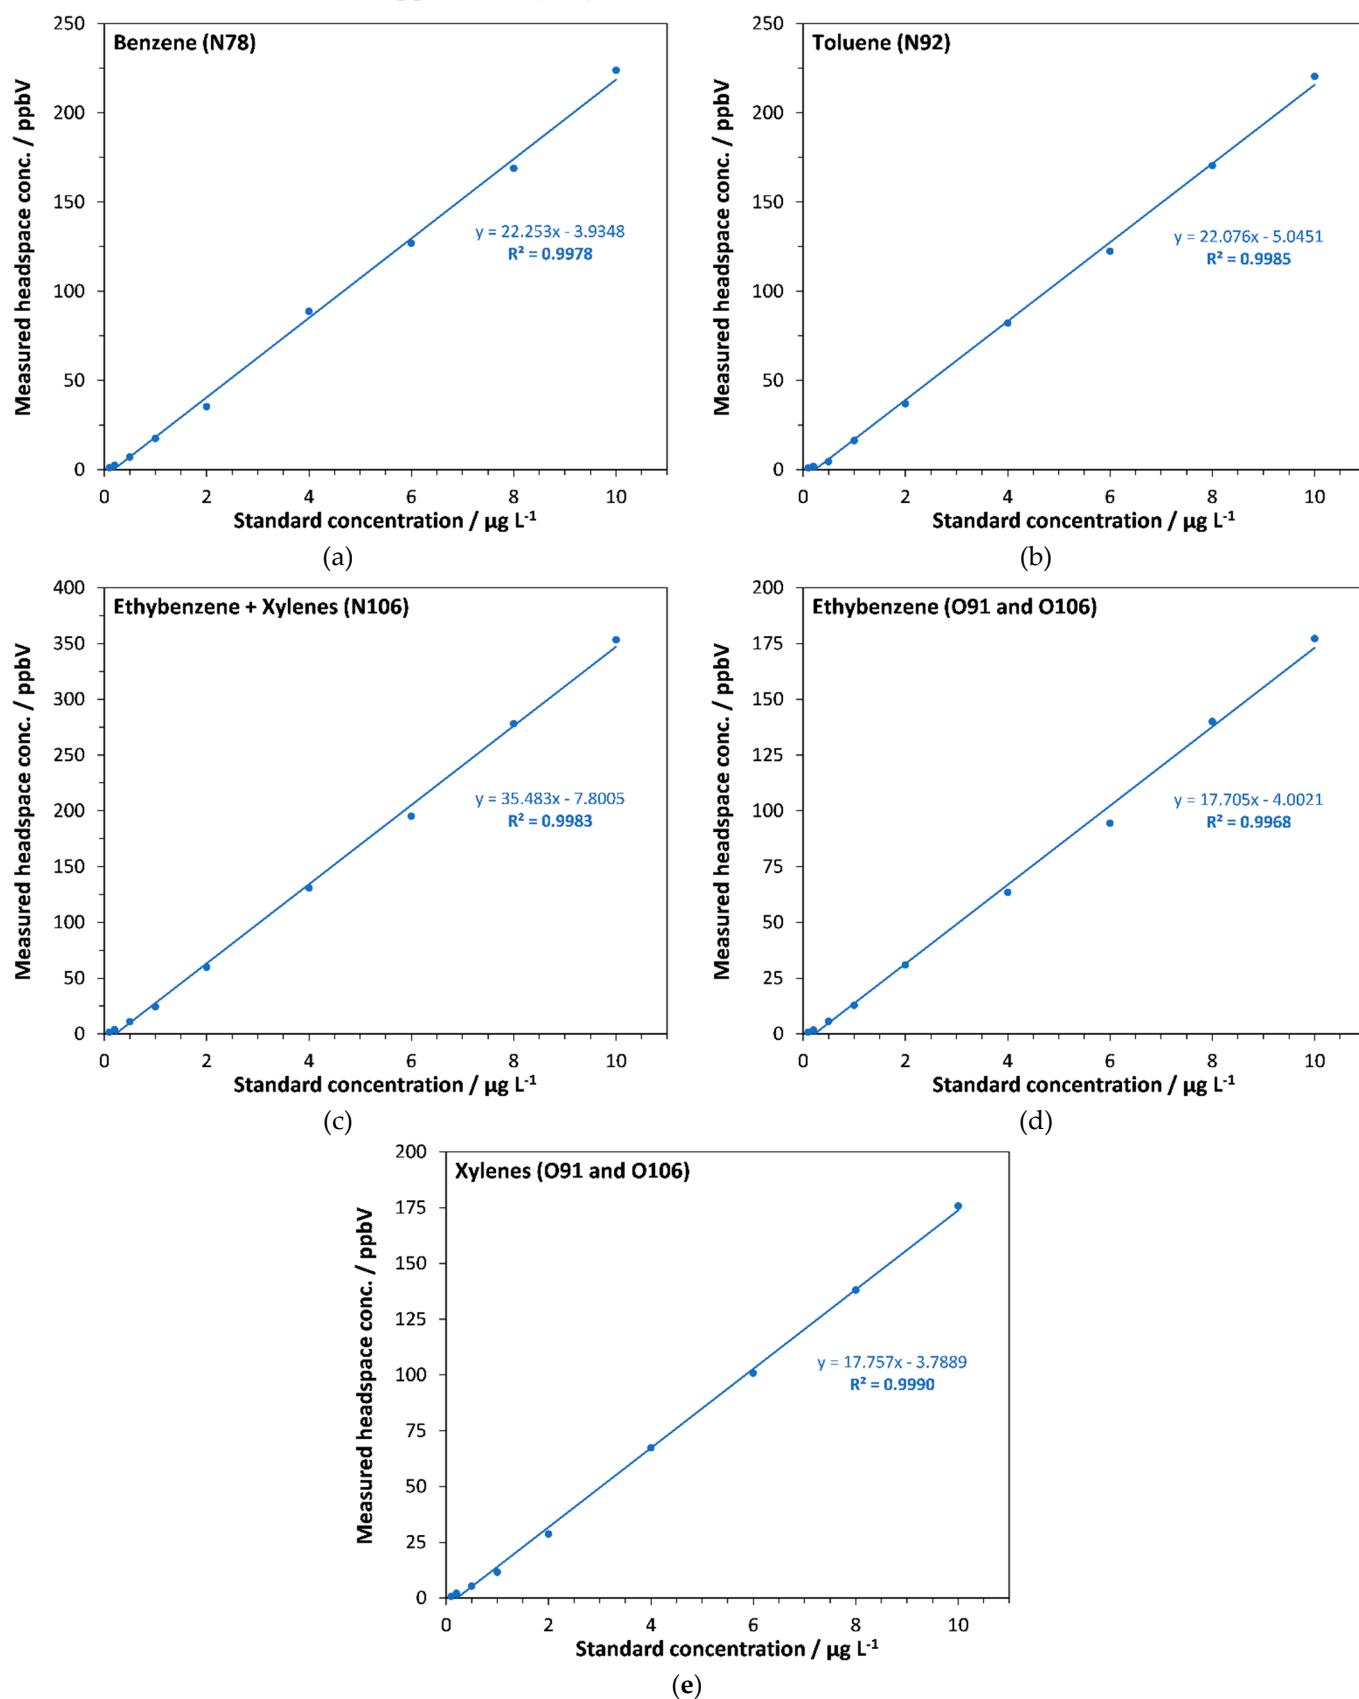

**Figure S1.** Linearity of headspace measurements of BTEX compounds: (a) benzene; (b) toluene; (c) total ethylbenzene and xylenes; (d) ethylbenzene; (e) xylenes. The linear fit and its regression coefficient,  $R^2$ , are shown.

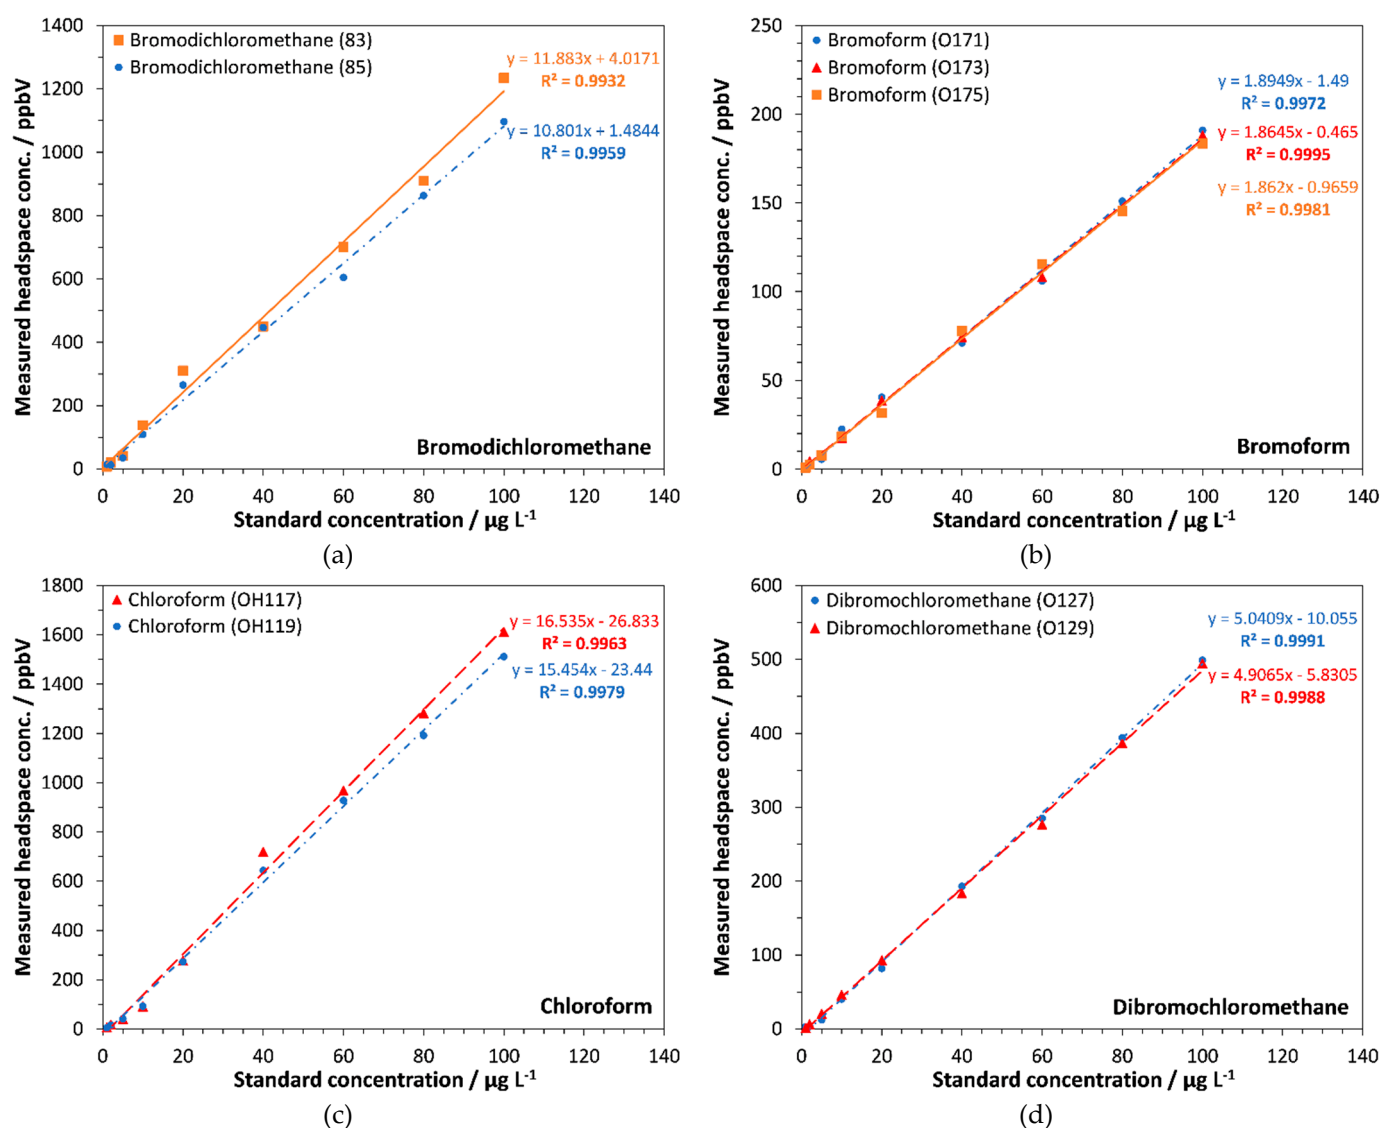

**Figure S2.** Linearity of headspace measurements of individual quantitation ions of the THMs: (a) bromodichloromethane; (b) bromoform; (c) chloroform; (d) dibromochloromethane. The linear fit and its regression coefficient,  $R^2$ , are shown.

## 2. Supplementary Tables

**Table S1.** Linearity data for BTEX. The linear regression coefficient,  $R^2$ , is also shown. Headspace concentrations are in parts per billion by volume (ppbV).

| Solution Conc. / $\mu\text{g L}^{-1}$ | Benzene ( $\text{NO}^+ 78$ ) | Toluene ( $\text{NO}^+ 92$ ) | Ethylbenzene + Xylenes ( $\text{NO}^+ 106$ ) | Ethylbenzene ( $\text{O}_2^+ 91$ and $106$ )* | Xylenes ( $\text{O}_2^+ 91$ and $106$ )* |
|---------------------------------------|------------------------------|------------------------------|----------------------------------------------|-----------------------------------------------|------------------------------------------|
| 0.1                                   | 1.21                         | 1.12                         | 1.51                                         | 0.772                                         | 0.737                                    |
| 0.2                                   | 2.54                         | 1.96                         | 3.84                                         | 1.75                                          | 2.10                                     |
| 0.5                                   | 7.12                         | 4.56                         | 11.0                                         | 5.61                                          | 5.37                                     |
| 1                                     | 17.5                         | 16.3                         | 24.4                                         | 12.8                                          | 11.6                                     |
| 2                                     | 35.3                         | 37.0                         | 59.7                                         | 30.9                                          | 28.7                                     |
| 4                                     | 88.8                         | 82.2                         | 131                                          | 63.4                                          | 67.4                                     |
| 6                                     | 127                          | 122                          | 195                                          | 94.5                                          | 101                                      |
| 8                                     | 169                          | 170                          | 278                                          | 140                                           | 138                                      |
| 10                                    | 224                          | 220                          | 353                                          | 177                                           | 176                                      |
| $R^2$                                 | 0.9978                       | 0.9985                       | 0.9983                                       | 0.9968                                        | 0.9990                                   |

\* See the article for details of deconvolution of ethylbenzene and the xylenes using the  $\text{O}_2^+$  product ions.

**Table S2.** Linearity data for the individual quantitation ions of the THM compounds. The linear regression coefficient,  $R^2$ , is also shown. Headspace concentrations are in ppbV.

| Solution Conc. / $\mu\text{g L}^{-1}$ | Bromodi-chloro-methane ( $\text{O}_2^+ 83$ )* | Bromodi-chloro-methane ( $\text{O}_2^+ 85$ )* | Bromo-form ( $\text{O}_2^+ 171$ ) | Bromo-form ( $\text{O}_2^+ 173$ ) | Bromo-form ( $\text{O}_2^+ 175$ ) | Chloro-form ( $\text{OH}^- 117$ ) | Chloro-form ( $\text{OH}^- 119$ ) | Dibromo-chloro-methane ( $\text{O}_2^+ 127$ ) | Dibromo-chloro-methane ( $\text{O}_2^+ 129$ ) |
|---------------------------------------|-----------------------------------------------|-----------------------------------------------|-----------------------------------|-----------------------------------|-----------------------------------|-----------------------------------|-----------------------------------|-----------------------------------------------|-----------------------------------------------|
| 1                                     | 7.46                                          | 14.3                                          | -1.26                             | 1.82                              | 0.802                             | 6.78                              | 5.42                              | 3.07                                          | 1.27                                          |
| 2                                     | 20.3                                          | 12.4                                          | 2.76                              | 4.30                              | 2.49                              | 18.1                              | 16.2                              | 3.68                                          | 6.34                                          |
| 5                                     | 41.5                                          | 35.1                                          | 5.54                              | 7.92                              | 7.70                              | 41.0                              | 41.5                              | 12.4                                          | 20.4                                          |
| 10                                    | 139                                           | 109                                           | 22.4                              | 17.6                              | 18.4                              | 91.4                              | 92.7                              | 40.4                                          | 46.0                                          |
| 20                                    | 310                                           | 265                                           | 40.4                              | 38.4                              | 31.6                              | 277                               | 273                               | 81.9                                          | 93.0                                          |
| 40                                    | 450                                           | 447                                           | 71.1                              | 74.4                              | 77.8                              | 719                               | 644                               | 193                                           | 183                                           |
| 60                                    | 701                                           | 605                                           | 106                               | 108                               | 116                               | 968                               | 928                               | 285                                           | 276                                           |
| 80                                    | 910                                           | 863                                           | 151                               | 148                               | 146                               | 1282                              | 1192                              | 394                                           | 386                                           |
| 100                                   | 1235                                          | 1096                                          | 191                               | 188                               | 184                               | 1612                              | 1512                              | 499                                           | 494                                           |
| $R^2$                                 | 0.9932                                        | 0.9959                                        | 0.9972                            | 0.9995                            | 0.9981                            | 0.9963                            | 0.9979                            | 0.9991                                        | 0.9988                                        |

\* See the article for details of subtraction of chloroform interference.

**Table S3.** Data obtained for determination of the lower limit of quantitation (LLOQ) of BTEX compounds at sub- $\mu\text{g L}^{-1}$  concentrations (0.1, 0.2, 0.5  $\mu\text{g L}^{-1}$ ) in solution. Mean, standard deviation (SD), and relative standard deviation (RSD, in %) are shown in for the triplicate measurements made at each level. Headspace concentrations are in ppbV.

| Solution Conc. / $\mu\text{g L}^{-1}$ | Replicate No. / Statistical Parameter | Benzene ( $\text{NO}^+ 78$ ) | Toluene ( $\text{NO}^+ 92$ ) | Ethylbenzene + Xylenes ( $\text{NO}^+ 106$ ) | Ethylbenzene ( $\text{O}_2^+ 91$ and $106$ )* | Xylenes ( $\text{O}_2^+ 91$ and $106$ )* |
|---------------------------------------|---------------------------------------|------------------------------|------------------------------|----------------------------------------------|-----------------------------------------------|------------------------------------------|
| 0.1                                   | 1                                     | 0.810                        | 0.990                        | 1.45                                         | 0.720                                         | 0.730                                    |
|                                       | 2                                     | 0.880                        | 0.530                        | 1.33                                         | 0.727                                         | 0.595                                    |
|                                       | 3                                     | 1.08                         | 0.820                        | 1.10                                         | 0.570                                         | 0.530                                    |
|                                       | Mean                                  | 0.923                        | 0.780                        | 1.29                                         | 0.672                                         | 0.619                                    |
|                                       | SD                                    | 0.114                        | 0.190                        | 0.145                                        | 0.073                                         | 0.083                                    |
|                                       | %RSD                                  | 12.4                         | 24.3                         | 11.2                                         | 10.8                                          | 13.5                                     |
| 0.2                                   | 1                                     | 3.31                         | 2.26                         | 3.51                                         | 2.04                                          | 1.46                                     |

| Solution Conc. / $\mu\text{g L}^{-1}$ | Replicate No. / Statistical Parameter | Benzene (NO <sup>+</sup> 78) | Toluene (NO <sup>+</sup> 92) | Ethylbenzene + Xylenes (NO <sup>+</sup> 106) | Ethylbenzene (O <sub>2</sub> <sup>+</sup> 91 and 106)* | Xylenes (O <sub>2</sub> <sup>+</sup> 91 and 106)* |
|---------------------------------------|---------------------------------------|------------------------------|------------------------------|----------------------------------------------|--------------------------------------------------------|---------------------------------------------------|
| 0.5                                   | 2                                     | 3.40                         | 1.98                         | 3.87                                         | 2.39                                                   | 1.45                                              |
|                                       | 3                                     | 2.79                         | 2.08                         | 3.85                                         | 2.24                                                   | 1.59                                              |
|                                       | Mean                                  | 3.17                         | 2.11                         | 3.74                                         | 2.22                                                   | 1.50                                              |
|                                       | SD                                    | 0.269                        | 0.116                        | 0.165                                        | 0.146                                                  | 0.062                                             |
|                                       | %RSD                                  | 8.5                          | 5.5                          | 4.4                                          | 6.6                                                    | 4.2                                               |
|                                       | 1                                     | 4.53                         | 4.63                         | 6.02                                         | 2.71                                                   | 3.32                                              |
|                                       | 2                                     | 3.94                         | 3.89                         | 6.79                                         | 3.34                                                   | 3.45                                              |
| 0.5                                   | 3                                     | 4.29                         | 4.07                         | 5.81                                         | 2.81                                                   | 3.01                                              |
|                                       | Mean                                  | 4.25                         | 4.20                         | 6.21                                         | 2.95                                                   | 3.26                                              |
|                                       | SD                                    | 0.242                        | 0.315                        | 0.422                                        | 0.277                                                  | 0.186                                             |
|                                       | %RSD                                  | 5.7                          | 7.5                          | 6.8                                          | 9.4                                                    | 5.7                                               |

\* See the article for details of deconvolution of ethylbenzene and the xylenes using the O<sub>2</sub><sup>+</sup> product ions.

**Table S4.** Data obtained for determination of the LLOQ of THM compounds by individual quantitation ions at low  $\mu\text{g L}^{-1}$  concentrations (1, 2, 5  $\mu\text{g L}^{-1}$ ) in solution. Mean, standard deviation (SD), and RSD (in %) are shown in for the triplicate measurements made at each level. Headspace concentrations are in ppbV.

| Solution Conc. / $\mu\text{g L}^{-1}$ | Replicate No. / Statistical Parameter | Bromodi-chloro-methane (O <sub>2</sub> <sup>+</sup> 83)* | Bromodi-chloro-methane (O <sub>2</sub> <sup>+</sup> 85)* | Bromo-form (O <sub>2</sub> <sup>+</sup> 171) | Bromo-form (O <sub>2</sub> <sup>+</sup> 173) | Bromo-form (O <sub>2</sub> <sup>+</sup> 175) | Chloro-form (OH <sup>-</sup> 117) | Chloro-form (OH <sup>-</sup> 119) | Dibro-mo-chloro-methane (O <sub>2</sub> <sup>+</sup> 127) | Dibro-mo-chloro-methane (O <sub>2</sub> <sup>+</sup> 129) |
|---------------------------------------|---------------------------------------|----------------------------------------------------------|----------------------------------------------------------|----------------------------------------------|----------------------------------------------|----------------------------------------------|-----------------------------------|-----------------------------------|-----------------------------------------------------------|-----------------------------------------------------------|
| 1                                     | 1                                     | 23.9                                                     | 24.7                                                     | -2.35                                        | 2.01                                         | 0.963                                        | 7.92                              | 6.31                              | 2.97                                                      | 1.72                                                      |
|                                       | 2                                     | 33.2                                                     | 33.7                                                     | 2.76                                         | 1.52                                         | 1.77                                         | 8.02                              | 5.51                              | 2.51                                                      | 1.88                                                      |
|                                       | 3                                     | 31.9                                                     | 31.2                                                     | 0.340                                        | 0.977                                        | 1.31                                         | 8.62                              | 5.91                              | 1.00                                                      | 1.76                                                      |
|                                       | Mean                                  | 29.7                                                     | 29.9                                                     | 0.250                                        | 1.50                                         | 1.35                                         | 8.19                              | 5.91                              | 2.16                                                      | 1.79                                                      |
|                                       | SD                                    | 4.10                                                     | 3.80                                                     | 2.09                                         | 0.421                                        | 0.332                                        | 0.309                             | 0.327                             | 0.841                                                     | 0.068                                                     |
|                                       | %RSD                                  | 13.8                                                     | 12.7                                                     | 834.8                                        | 28.0                                         | 24.6                                         | 3.8                               | 5.5                               | 39.0                                                      | 3.8                                                       |
| 2                                     | 1                                     | 21.2                                                     | 22.8                                                     | 3.08                                         | 3.43                                         | 3.00                                         | 16.3                              | 14.8                              | 4.55                                                      | 4.58                                                      |
|                                       | 2                                     | 18.3                                                     | 25.2                                                     | 2.27                                         | 3.88                                         | 3.25                                         | 18.8                              | 14.6                              | 5.71                                                      | 5.18                                                      |
|                                       | 3                                     | 16.0                                                     | 20.9                                                     | 2.72                                         | 2.88                                         | 2.69                                         | 17.5                              | 12.7                              | 5.11                                                      | 5.17                                                      |
|                                       | Mean                                  | 18.51                                                    | 22.94                                                    | 2.69                                         | 3.39                                         | 2.98                                         | 17.55                             | 14.0                              | 5.12                                                      | 4.98                                                      |
|                                       | SD                                    | 2.12                                                     | 1.76                                                     | 0.331                                        | 0.409                                        | 0.229                                        | 1.02                              | 0.946                             | 0.474                                                     | 0.281                                                     |
|                                       | %RSD                                  | 11.4                                                     | 7.7                                                      | 12.3                                         | 12.0                                         | 7.7                                          | 5.8                               | 6.7                               | 9.2                                                       | 5.6                                                       |
| 5                                     | 1                                     | 34.8                                                     | 38.9                                                     | 5.57                                         | 6.80                                         | 7.70                                         | 36.4                              | 31.2                              | 16.6                                                      | 14.0                                                      |
|                                       | 2                                     | 42.7                                                     | 45.7                                                     | 6.57                                         | 6.99                                         | 6.80                                         | 35.8                              | 29.4                              | 18.1                                                      | 15.9                                                      |
|                                       | 3                                     | 32.0                                                     | 36.2                                                     | 5.97                                         | 8.22                                         | 6.71                                         | 38.2                              | 31.7                              | 16.0                                                      | 15.2                                                      |
|                                       | Mean                                  | 36.5                                                     | 40.2                                                     | 6.04                                         | 7.33                                         | 7.07                                         | 36.8                              | 30.8                              | 16.9                                                      | 15.1                                                      |
|                                       | SD                                    | 4.55                                                     | 3.99                                                     | 0.411                                        | 0.629                                        | 0.447                                        | 1.02                              | 0.988                             | 0.883                                                     | 0.785                                                     |
|                                       | %RSD                                  | 12.5                                                     | 9.9                                                      | 6.8                                          | 8.6                                          | 6.3                                          | 2.8                               | 3.2                               | 5.2                                                       | 5.2                                                       |

\* See the article for details of subtraction of chloroform interference.

**Table S5.** Precision data for BTEX, with the mean and standard deviation (SD) shown in ppbV measured in the headspace, RSD as a percentage.

| Solution Conc. /<br>$\mu\text{g L}^{-1}$ | Replicate No. /<br>Statistical Pa-<br>rameter | Benzene<br>(NO <sup>+</sup> 78) | Toluene<br>(NO <sup>+</sup> 92) | Ethylbenzene +<br>Xylenes<br>(NO <sup>+</sup> 106) | Ethylbenzene<br>(O <sub>2</sub> <sup>+</sup> 91 and<br>106)* | Xylenes (O <sub>2</sub> <sup>+</sup> 91<br>and 106)* |
|------------------------------------------|-----------------------------------------------|---------------------------------|---------------------------------|----------------------------------------------------|--------------------------------------------------------------|------------------------------------------------------|
| 1                                        | 1                                             | 17.2                            | 16.4                            | 25.1                                               | 13.3                                                         | 11.7                                                 |
|                                          | 2                                             | 15.8                            | 15.3                            | 25.8                                               | 13.3                                                         | 12.5                                                 |
|                                          | 3                                             | 13.2                            | 13.2                            | 22.5                                               | 10.9                                                         | 11.7                                                 |
|                                          | 4                                             | 14.9                            | 15.1                            | 24.9                                               | 13.1                                                         | 11.8                                                 |
|                                          | 5                                             | 16.4                            | 14.8                            | 25.4                                               | 12.1                                                         | 13.3                                                 |
|                                          | 6                                             | 15.4                            | 15.5                            | 23.7                                               | 11.2                                                         | 12.4                                                 |
|                                          | Mean                                          | 15.5                            | 15.0                            | 24.6                                               | 12.3                                                         | 12.2                                                 |
|                                          | SD                                            | 1.25                            | 0.964                           | 1.128                                              | 0.980                                                        | 0.579                                                |
|                                          | %RSD                                          | 8.1                             | 6.4                             | 4.6                                                | 8.0                                                          | 4.7                                                  |
| 5                                        | 1                                             | 95.9                            | 94.8                            | 154                                                | 74.4                                                         | 79.9                                                 |
|                                          | 2                                             | 98.8                            | 100                             | 158                                                | 80.7                                                         | 77.3                                                 |
|                                          | 3                                             | 109                             | 106                             | 181                                                | 94.7                                                         | 85.9                                                 |
|                                          | 4                                             | 97.8                            | 104                             | 159                                                | 77.0                                                         | 82.3                                                 |
|                                          | 5                                             | 110                             | 104                             | 159                                                | 78.0                                                         | 80.7                                                 |
|                                          | 6                                             | 102                             | 108                             | 159                                                | 81.3                                                         | 77.8                                                 |
|                                          | Mean                                          | 102                             | 103                             | 161.7                                              | 81.0                                                         | 80.6                                                 |
|                                          | SD                                            | 5.36                            | 4.48                            | 8.67                                               | 6.56                                                         | 2.91                                                 |
|                                          | %RSD                                          | 5.2                             | 4.3                             | 5.4                                                | 8.1                                                          | 3.6                                                  |
| 9                                        | 1                                             | 196                             | 197                             | 314                                                | 158                                                          | 156                                                  |
|                                          | 2                                             | 196                             | 192                             | 318                                                | 160                                                          | 158                                                  |
|                                          | 3                                             | 171                             | 178                             | 279                                                | 143                                                          | 135                                                  |
|                                          | 4                                             | 201                             | 199                             | 315                                                | 157                                                          | 157                                                  |
|                                          | 5                                             | 187                             | 188                             | 307                                                | 153                                                          | 154                                                  |
|                                          | 6                                             | 209                             | 205                             | 328                                                | 162                                                          | 165                                                  |
|                                          | Mean                                          | 193                             | 194                             | 310                                                | 155                                                          | 154                                                  |
|                                          | SD                                            | 12.0                            | 8.63                            | 15.27                                              | 6.25                                                         | 9.20                                                 |
|                                          | %RSD                                          | 6.2                             | 4.5                             | 4.9                                                | 4.0                                                          | 6.0                                                  |

\* See the article for details of deconvolution of ethylbenzene and the xylenes using the O<sub>2</sub><sup>+</sup> product ions.

**Table S6.** Precision data for the individual quantitation ions of the THM compounds, with the mean and standard deviation (SD) shown in ppbV measured in the headspace, and RSD as a percentage.

| Solution Conc. / $\mu\text{g L}^{-1}$ | Replicate No. / Statistical Parameter | Bromodi-chloro-methane ( $\text{O}_2^+ 83$ )* | Bromodi-chloro-methane ( $\text{O}_2^+ 85$ )* | Bromo-form ( $\text{O}_2^+ 171$ ) | Bromo-form ( $\text{O}_2^+ 173$ ) | Bromo-form ( $\text{O}_2^+ 175$ ) | Chloro-form ( $\text{OH}^- 117$ ) | Chloro-form ( $\text{OH}^- 119$ ) | Dibro-mo-chloro-methane ( $\text{O}_2^+ 127$ ) | Dibro-mo-chloro-methane ( $\text{O}_2^+ 129$ ) |
|---------------------------------------|---------------------------------------|-----------------------------------------------|-----------------------------------------------|-----------------------------------|-----------------------------------|-----------------------------------|-----------------------------------|-----------------------------------|------------------------------------------------|------------------------------------------------|
| 10                                    | 1                                     | 136                                           | 126                                           | 13.0                              | 13.9                              | 14.4                              | 91.6                              | 91.2                              | 38.5                                           | 38.1                                           |
|                                       | 2                                     | 92.4                                          | 100                                           | 14.0                              | 15.5                              | 13.9                              | 96.5                              | 93.2                              | 39.3                                           | 36.2                                           |
|                                       | 3                                     | 118                                           | 98.1                                          | 10.3                              | 14.5                              | 12.7                              | 81.5                              | 89.3                              | 33.7                                           | 35.9                                           |
|                                       | 4                                     | 99.7                                          | 111                                           | 12.3                              | 13.6                              | 15.2                              | 92.5                              | 93.0                              | 33.8                                           | 35.5                                           |
|                                       | 5                                     | 112                                           | 103                                           | 13.9                              | 14.5                              | 12.1                              | 87.1                              | 91.5                              | 36.5                                           | 38.8                                           |
|                                       | 6                                     | 98.4                                          | 92.9                                          | 12.9                              | 14.3                              | 15.9                              | 96.5                              | 94.0                              | 40.3                                           | 40.1                                           |
|                                       | Mean                                  | 109                                           | 105                                           | 12.7                              | 14.4                              | 14.1                              | 91.0                              | 92.0                              | 37.0                                           | 37.4                                           |
|                                       | SD                                    | 14.7                                          | 10.9                                          | 1.24                              | 0.60                              | 1.32                              | 5.30                              | 1.56                              | 2.58                                           | 1.68                                           |
|                                       | %RSD                                  | 13.4                                          | 10.4                                          | 9.7                               | 4.1                               | 9.4                               | 5.8                               | 1.7                               | 7.0                                            | 4.5                                            |
| 50                                    | 1                                     | 605                                           | 546                                           | 81.5                              | 96.3                              | 93.5                              | 729                               | 687                               | 232                                            | 227                                            |
|                                       | 2                                     | 589                                           | 529                                           | 80.3                              | 92.0                              | 83.4                              | 746                               | 718                               | 223                                            | 234                                            |
|                                       | 3                                     | 806                                           | 527                                           | 97.3                              | 106                               | 111                               | 690                               | 785                               | 286                                            | 274                                            |
|                                       | 4                                     | 521                                           | 547                                           | 89.4                              | 80.5                              | 87.1                              | 757                               | 686                               | 236                                            | 241                                            |
|                                       | 5                                     | 736                                           | 706                                           | 90.9                              | 86.8                              | 87.6                              | 767                               | 713                               | 264                                            | 243                                            |
|                                       | 6                                     | 661                                           | 664                                           | 94.3                              | 97.7                              | 89.9                              | 789                               | 754                               | 262                                            | 264                                            |
|                                       | Mean                                  | 653                                           | 586                                           | 88.9                              | 93.3                              | 92.0                              | 746                               | 724                               | 251                                            | 247                                            |
|                                       | SD                                    | 95.0                                          | 71.2                                          | 6.2                               | 8.2                               | 8.8                               | 31.2                              | 35.6                              | 21.9                                           | 16.5                                           |
|                                       | %RSD                                  | 14.5                                          | 12.1                                          | 7.0                               | 8.8                               | 9.6                               | 4.2                               | 4.9                               | 8.7                                            | 6.7                                            |
| 90                                    | 1                                     | 845                                           | 890                                           | 156                               | 173                               | 156                               | 1523                              | 1394                              | 427                                            | 429                                            |
|                                       | 2                                     | 1034                                          | 1052                                          | 153                               | 158                               | 149                               | 1453                              | 1294                              | 445                                            | 422                                            |
|                                       | 3                                     | 944                                           | 812                                           | 136                               | 165                               | 152                               | 1133                              | 1084                              | 376                                            | 387                                            |
|                                       | 4                                     | 1047                                          | 1012                                          | 158                               | 150                               | 155                               | 1413                              | 1294                              | 442                                            | 443                                            |
|                                       | 5                                     | 813                                           | 826                                           | 154                               | 157                               | 155                               | 1473                              | 1344                              | 401                                            | 426                                            |
|                                       | 6                                     | 1145                                          | 1119                                          | 158                               | 156                               | 176                               | 1523                              | 1434                              | 477                                            | 476                                            |
|                                       | Mean                                  | 971                                           | 952                                           | 153                               | 160                               | 157                               | 1419                              | 1307                              | 428                                            | 431                                            |
|                                       | SD                                    | 117                                           | 116                                           | 7.61                              | 7.34                              | 8.74                              | 134                               | 112                               | 32.5                                           | 26.5                                           |
|                                       | %RSD                                  | 12.0                                          | 12.2                                          | 5.0                               | 4.6                               | 5.6                               | 9.4                               | 8.6                               | 7.6                                            | 6.2                                            |

\* See the article for details of subtraction of chloroform interference.

**Table S7.** Measured concentrations (in  $\mu\text{g L}^{-1}$ ) in a drinking water sample (Cambridge, UK) for BTEX using the individual quantitation ions. The mean, standard deviation (SD), and RSD are also shown.

| Amount /<br>$\mu\text{g L}^{-1}$ | Benzene ( $\text{NO}^+ 78$ ) | Toluene ( $\text{NO}^+ 92$ ) | Ethylbenzene + Xy-<br>lenes ( $\text{NO}^+ 106$ ) | Ethylbenzene<br>( $\text{O}_2^+ 91$ and $106$ )* | Xylenes<br>( $\text{O}_2^+ 91$ and $106$ )* |
|----------------------------------|------------------------------|------------------------------|---------------------------------------------------|--------------------------------------------------|---------------------------------------------|
| Repl. 1                          | 0.05                         | -0.25                        | 0.00                                              | 0.01                                             | -0.03                                       |
| Repl. 2                          | 0.20                         | -0.30                        | 0.01                                              | 0.01                                             | 0.01                                        |
| Repl. 3                          | -0.11                        | -0.38                        | -0.02                                             | -0.01                                            | -0.04                                       |
| Repl. 4                          | 0.06                         | -0.27                        | 0.00                                              | 0.01                                             | -0.02                                       |
| Repl. 5                          | 0.12                         | -0.22                        | -0.02                                             | 0.01                                             | -0.04                                       |
| Repl. 6                          | 0.08                         | -0.32                        | 0.00                                              | 0.00                                             | 0.00                                        |
| Mean                             | 0.07                         | -0.29                        | -0.01                                             | 0.01                                             | -0.02                                       |
| SD                               | 0.09                         | 0.05                         | 0.01                                              | 0.01                                             | 0.02                                        |
| %RSD                             | 135.9                        | -17.5                        | -160.3                                            | 162.2                                            | -95.3                                       |

\* See the article for details on deconvolution of ethylbenzene and the xylenes using the  $\text{O}_2^+$  product ions.

**Table S8.** Measured concentrations (in  $\mu\text{g L}^{-1}$ ) in a drinking water sample (Cambridge, UK) for the THMs using the individual quantitation ions. The mean, standard deviation (SD), and RSD are also shown.

| Amount /<br>$\mu\text{g L}^{-1}$ | Bromodi-<br>chloro-<br>methane<br>( $\text{O}_2^+ 83$ )* | Bromodi-<br>chloro-<br>methane<br>( $\text{O}_2^+ 85$ )* | Bromo-<br>form ( $\text{O}_2^+$<br>171) | Bromo-<br>form ( $\text{O}_2^+$<br>173) | Bromo-<br>form ( $\text{O}_2^+$<br>175) | Chloro-<br>form ( $\text{OH}^-$<br>117) | Chloro-<br>form ( $\text{OH}^-$<br>119) | Dibromo-<br>chloro-<br>methane<br>( $\text{O}_2^+ 127$ ) | Dibromo-<br>chloro-<br>methane<br>( $\text{O}_2^+ 129$ ) |
|----------------------------------|----------------------------------------------------------|----------------------------------------------------------|-----------------------------------------|-----------------------------------------|-----------------------------------------|-----------------------------------------|-----------------------------------------|----------------------------------------------------------|----------------------------------------------------------|
| Repl. 1                          | 3.34                                                     | 1.48                                                     | 8.62                                    | 6.58                                    | 9.53                                    | 0.30                                    | 0.22                                    | 3.71                                                     | 4.16                                                     |
| Repl. 2                          | 2.97                                                     | 1.81                                                     | 10.6                                    | 8.92                                    | 8.85                                    | 0.34                                    | 0.26                                    | 5.56                                                     | 4.01                                                     |
| Repl. 3                          | 7.62                                                     | 5.40                                                     | 8.46                                    | 6.74                                    | 7.65                                    | 0.26                                    | 0.48                                    | 4.74                                                     | 4.24                                                     |
| Repl. 4                          | 2.47                                                     | 2.39                                                     | 9.92                                    | 8.56                                    | 8.93                                    | 0.33                                    | 0.22                                    | 4.43                                                     | 4.08                                                     |
| Repl. 5                          | 1.98                                                     | 2.09                                                     | 10.7                                    | 6.42                                    | 9.46                                    | 0.51                                    | 0.33                                    | 4.17                                                     | 3.83                                                     |
| Repl. 6                          | 2.51                                                     | 1.11                                                     | 10.2                                    | 7.35                                    | 8.70                                    | 0.31                                    | 0.19                                    | 4.10                                                     | 3.47                                                     |
| Mean                             | 3.48                                                     | 2.38                                                     | 9.73                                    | 7.43                                    | 8.85                                    | 0.34                                    | 0.29                                    | 4.45                                                     | 3.97                                                     |
| SD                               | 1.90                                                     | 1.41                                                     | 0.88                                    | 0.98                                    | 0.62                                    | 0.079                                   | 0.10                                    | 0.58                                                     | 0.25                                                     |
| %RSD                             | 54.5                                                     | 59.4                                                     | 9.0                                     | 13.1                                    | 7.0                                     | 23.1                                    | 34.2                                    | 13.1                                                     | 6.4                                                      |

\* See the article for details of subtraction of chloroform interference.

**Table S9.** Accuracy data ( $\mu\text{g L}^{-1}$  in solution) for BTEX spiked in triplicate at three levels in drinking water (Cambridge, UK). The mean, standard deviation (SD), and RSD (in %) are also shown.

| Solution Conc. /<br>$\mu\text{g L}^{-1}$ | Replicate No. /<br>Statistical Pa-<br>rameter | Benzene<br>( $\text{NO}^+ 78$ ) | Toluene<br>( $\text{NO}^+ 92$ ) | Ethylbenzene +<br>Xylenes<br>( $\text{NO}^+ 106$ ) | Ethylbenzene<br>( $\text{O}_2^+ 91$ and<br>106)* | Xylenes ( $\text{O}_2^+ 91$<br>and 106)* |
|------------------------------------------|-----------------------------------------------|---------------------------------|---------------------------------|----------------------------------------------------|--------------------------------------------------|------------------------------------------|
| 2.5                                      | 1                                             | 2.29                            | 2.09                            | 2.17                                               | 2.30                                             | 2.05                                     |
|                                          | 2                                             | 2.15                            | 1.92                            | 2.02                                               | 2.02                                             | 2.03                                     |
|                                          | 3                                             | 2.26                            | 2.02                            | 2.13                                               | 2.12                                             | 2.14                                     |
|                                          | Mean                                          | 2.24                            | 2.01                            | 2.11                                               | 2.15                                             | 2.07                                     |
|                                          | SD                                            | 0.060                           | 0.067                           | 0.061                                              | 0.12                                             | 0.047                                    |
|                                          | %RSD                                          | 2.66                            | 3.34                            | 2.90                                               | 5.41                                             | 2.29                                     |
| 5.0                                      | 1                                             | 4.81                            | 4.83                            | 4.76                                               | 5.18                                             | 4.37                                     |
|                                          | 2                                             | 4.66                            | 4.18                            | 4.78                                               | 4.97                                             | 4.61                                     |
|                                          | 3                                             | 4.20                            | 3.72                            | 3.98                                               | 3.95                                             | 4.01                                     |
|                                          | Mean                                          | 4.56                            | 4.24                            | 4.51                                               | 4.70                                             | 4.33                                     |
|                                          | SD                                            | 0.26                            | 0.45                            | 0.37                                               | 0.54                                             | 0.25                                     |
|                                          | %RSD                                          | 5.67                            | 10.72                           | 8.24                                               | 11.48                                            | 5.72                                     |



| Solution Conc. / $\mu\text{g L}^{-1}$ | Replicate No. / Statistical Parameter | Benzene (NO <sup>+</sup> 78) | Toluene (NO <sup>+</sup> 92) | Ethylbenzene + Xylenes (NO <sup>+</sup> 106) | Ethylbenzene (O <sub>2</sub> <sup>+</sup> 91 and 106)* | Xylenes (O <sub>2</sub> <sup>+</sup> 91 and 106)* |
|---------------------------------------|---------------------------------------|------------------------------|------------------------------|----------------------------------------------|--------------------------------------------------------|---------------------------------------------------|
| 7.5                                   | 1                                     | 7.18                         | 6.68                         | 7.35                                         | 7.31                                                   | 7.39                                              |
|                                       | 2                                     | 6.83                         | 6.48                         | 6.78                                         | 7.10                                                   | 6.49                                              |
|                                       | 3                                     | 7.24                         | 6.68                         | 7.19                                         | 7.88                                                   | 6.57                                              |
|                                       | Mean                                  | 7.08                         | 6.62                         | 7.11                                         | 7.43                                                   | 6.82                                              |
|                                       | SD                                    | 0.18                         | 0.094                        | 0.24                                         | 0.33                                                   | 0.41                                              |
|                                       | %RSD                                  | 2.55                         | 1.42                         | 3.37                                         | 4.40                                                   | 5.94                                              |

\* See the article for details of deconvolution of ethylbenzene and the xylenes using the O<sub>2</sub><sup>+</sup> product ions.

**Table S10.** Accuracy data ( $\mu\text{g L}^{-1}$  in solution) for the individual quantitation ions of the THMs spiked in triplicate at three levels in drinking water (Cambridge, UK). The mean, standard deviation (SD), and RSD (in %) are also shown.

| Solution Conc. / $\mu\text{g L}^{-1}$ | Replicate No. / Statistical Parameter | Bromodi-chloro-methane* (O <sub>2</sub> <sup>+</sup> 83)* | Bromodi-chloro-methane* (O <sub>2</sub> <sup>+</sup> 85)* | Bromo-form (O <sub>2</sub> <sup>+</sup> 171) | Bromo-form (O <sub>2</sub> <sup>+</sup> 173) | Bromo-form (O <sub>2</sub> <sup>+</sup> 175) | Chloro-form (OH <sup>-</sup> 117) | Chloro-form (OH <sup>-</sup> 119) | Dibro-mo-chloro-methane (O <sub>2</sub> <sup>+</sup> 127) | Dibro-mo-chloro-methane (O <sub>2</sub> <sup>+</sup> 129) |
|---------------------------------------|---------------------------------------|-----------------------------------------------------------|-----------------------------------------------------------|----------------------------------------------|----------------------------------------------|----------------------------------------------|-----------------------------------|-----------------------------------|-----------------------------------------------------------|-----------------------------------------------------------|
| 25                                    | 1                                     | 31.6                                                      | 27.1                                                      | 37.9                                         | 35.9                                         | 38.6                                         | 23.1                              | 23.9                              | 33.5                                                      | 31.0                                                      |
|                                       | 2                                     | 33.3                                                      | 36.8                                                      | 52.9                                         | 45.4                                         | 39.6                                         | 18.9                              | 20.2                              | 34.0                                                      | 33.8                                                      |
|                                       | 3                                     | 32.9                                                      | 27.9                                                      | 37.7                                         | 31.0                                         | 33.0                                         | 20.6                              | 21.7                              | 31.0                                                      | 28.9                                                      |
|                                       | Mean                                  | 32.6                                                      | 30.6                                                      | 42.8                                         | 37.4                                         | 37.1                                         | 20.9                              | 21.9                              | 32.8                                                      | 31.2                                                      |
|                                       | SD                                    | 0.74                                                      | 4.4                                                       | 7.1                                          | 6.0                                          | 2.9                                          | 1.7                               | 1.5                               | 1.3                                                       | 2.0                                                       |
|                                       | %RSD                                  | 2.3                                                       | 14.3                                                      | 16.6                                         | 16.1                                         | 7.8                                          | 8.2                               | 6.9                               | 4.1                                                       | 6.4                                                       |
| 50                                    | 1                                     | 107.3                                                     | 117.0                                                     | 68.5                                         | 61.2                                         | 63.4                                         | 29.9                              | 29.7                              | 57.6                                                      | 59.5                                                      |
|                                       | 2                                     | 61.2                                                      | 57.3                                                      | 69.0                                         | 58.5                                         | 58.6                                         | 44.5                              | 46.6                              | 55.8                                                      | 51.4                                                      |
|                                       | 3                                     | 40.3                                                      | 38.6                                                      | 55.6                                         | 48.9                                         | 49.9                                         | 42.3                              | 43.1                              | 48.9                                                      | 46.5                                                      |
|                                       | Mean                                  | 69.6                                                      | 71.0                                                      | 64.4                                         | 56.2                                         | 57.3                                         | 38.9                              | 39.8                              | 54.1                                                      | 52.5                                                      |
|                                       | SD                                    | 28.0                                                      | 33.5                                                      | 6.2                                          | 5.3                                          | 5.6                                          | 6.4                               | 7.3                               | 3.8                                                       | 5.4                                                       |
|                                       | %RSD                                  | 40.2                                                      | 47.2                                                      | 9.6                                          | 9.4                                          | 9.8                                          | 16.6                              | 18.3                              | 6.9                                                       | 10.2                                                      |
| 75                                    | 1                                     | 93.2                                                      | 86.6                                                      | 90.8                                         | 81.1                                         | 90.5                                         | 68.5                              | 71.3                              | 78.6                                                      | 80.9                                                      |
|                                       | 2                                     | 88.7                                                      | 78.6                                                      | 82.6                                         | 74.0                                         | 76.9                                         | 64.7                              | 67.2                              | 72.7                                                      | 72.5                                                      |
|                                       | 3                                     | 83.9                                                      | 88.9                                                      | 77.9                                         | 76.1                                         | 76.9                                         | 71.4                              | 69.4                              | 86.5                                                      | 73.0                                                      |
|                                       | Mean                                  | 88.6                                                      | 84.7                                                      | 83.8                                         | 77.1                                         | 81.5                                         | 68.2                              | 69.3                              | 79.3                                                      | 75.5                                                      |
|                                       | SD                                    | 3.8                                                       | 4.4                                                       | 5.3                                          | 3.0                                          | 6.4                                          | 2.8                               | 1.7                               | 5.7                                                       | 3.9                                                       |
|                                       | %RSD                                  | 4.3                                                       | 5.2                                                       | 6.3                                          | 3.9                                          | 7.9                                          | 4.1                               | 2.5                               | 7.1                                                       | 5.1                                                       |

\* See the article for details of subtraction of chloroform interference.

**Table S11.** Recovery data (%) for BTEX spiked in triplicate at three levels in drinking water (Cambridge, UK). The mean, standard deviation (SD), and RSD are also shown.

| <b>Solution Conc. /<br/>µg L<sup>-1</sup></b> | <b>Replicate No. /<br/>Statistical Parameter</b> | <b>Benzene<br/>(NO<sup>+</sup> 78)</b> | <b>Toluene<br/>(NO<sup>+</sup> 92)</b> | <b>Ethylbenzene +<br/>Xylenes<br/>(NO<sup>+</sup> 106)</b> | <b>Ethylbenzene<br/>(O<sub>2</sub><sup>+</sup> 91 and<br/>106)*</b> | <b>Xylenes (O<sub>2</sub><sup>+</sup> 91<br/>and 106)*</b> |
|-----------------------------------------------|--------------------------------------------------|----------------------------------------|----------------------------------------|------------------------------------------------------------|---------------------------------------------------------------------|------------------------------------------------------------|
| <b>2.5</b>                                    | 1                                                | 91.8                                   | 83.5                                   | 86.6                                                       | 92.0                                                                | 81.8                                                       |
|                                               | 2                                                | 86.2                                   | 77.0                                   | 80.9                                                       | 80.7                                                                | 81.2                                                       |
|                                               | 3                                                | 90.4                                   | 80.9                                   | 85.2                                                       | 84.9                                                                | 85.5                                                       |
|                                               | <i>Mean</i>                                      | 89.5                                   | 80.5                                   | 84.2                                                       | 85.9                                                                | 82.8                                                       |
|                                               | <i>SD</i>                                        | 2.4                                    | 2.7                                    | 2.4                                                        | 4.6                                                                 | 1.9                                                        |
|                                               | <i>%RSD</i>                                      | 2.7                                    | 3.3                                    | 2.9                                                        | 5.4                                                                 | 2.3                                                        |
| <b>5.0</b>                                    | 1                                                | 96.2                                   | 96.6                                   | 95.1                                                       | 103.7                                                               | 87.4                                                       |
|                                               | 2                                                | 93.3                                   | 83.5                                   | 95.6                                                       | 99.4                                                                | 92.2                                                       |
|                                               | 3                                                | 84.1                                   | 74.4                                   | 79.6                                                       | 79.0                                                                | 80.2                                                       |
|                                               | <i>Mean</i>                                      | 91.2                                   | 84.8                                   | 90.1                                                       | 94.0                                                                | 86.6                                                       |
|                                               | <i>SD</i>                                        | 5.2                                    | 9.1                                    | 7.4                                                        | 10.8                                                                | 5.0                                                        |
|                                               | <i>%RSD</i>                                      | 5.7                                    | 10.7                                   | 8.2                                                        | 11.5                                                                | 5.7                                                        |
| <b>7.5</b>                                    | 1                                                | 95.7                                   | 89.1                                   | 98.0                                                       | 97.4                                                                | 98.5                                                       |
|                                               | 2                                                | 91.0                                   | 86.5                                   | 90.4                                                       | 94.7                                                                | 86.6                                                       |
|                                               | 3                                                | 96.5                                   | 89.1                                   | 95.8                                                       | 105.0                                                               | 87.6                                                       |
|                                               | <i>Mean</i>                                      | 94.4                                   | 88.2                                   | 94.8                                                       | 99.1                                                                | 90.9                                                       |
|                                               | <i>SD</i>                                        | 2.4                                    | 1.3                                    | 3.2                                                        | 4.4                                                                 | 5.4                                                        |
|                                               | <i>%RSD</i>                                      | 2.5                                    | 1.4                                    | 3.4                                                        | 4.4                                                                 | 5.9                                                        |

\* See the article for details of deconvolution of ethylbenzene and the xylenes using the O<sub>2</sub><sup>+</sup> product ions.

**Table S12.** Recovery data (%) for the individual quantitation ions of the THMs spiked in triplicate at three levels in drinking water (Cambridge, UK). The mean, standard deviation (SD), and RSD are also shown.

| Solution Conc. / $\mu\text{g L}^{-1}$ | Replicate No. / Statistical Parameter | Bromodi-chloro-methane ( $\text{O}_2^+ 83$ )* | Bromodi-chloro-methane ( $\text{O}_2^+ 85$ )* | Bromo-form ( $\text{O}_2^+ 171$ ) | Bromo-form ( $\text{O}_2^+ 173$ ) | Bromo-form ( $\text{O}_2^+ 175$ ) | Chloro-form ( $\text{OH}^- 117$ ) | Chloro-form ( $\text{OH}^- 119$ ) | Dibro-mo-chloro-methane ( $\text{O}_2^+ 127$ ) | Dibro-mo-chloro-methane ( $\text{O}_2^+ 129$ ) |
|---------------------------------------|---------------------------------------|-----------------------------------------------|-----------------------------------------------|-----------------------------------|-----------------------------------|-----------------------------------|-----------------------------------|-----------------------------------|------------------------------------------------|------------------------------------------------|
| 25                                    | 1                                     | 112.4                                         | 99.0                                          | 112.7                             | 113.8                             | 119.1                             | 94.4                              | 91.1                              | 116.3                                          | 108.0                                          |
|                                       | 2                                     | 119.2                                         | 137.5                                         | 172.6                             | 152.0                             | 123.0                             | 79.7                              | 74.4                              | 118.3                                          | 119.2                                          |
|                                       | 3                                     | 117.8                                         | 102.0                                         | 112.0                             | 94.1                              | 96.7                              | 85.5                              | 81.1                              | 106.0                                          | 99.8                                           |
|                                       | Mean                                  | 116.5                                         | 112.8                                         | 132.4                             | 120.0                             | 112.9                             | 86.5                              | 82.2                              | 113.6                                          | 109.0                                          |
|                                       | SD                                    | 2.9                                           | 17.5                                          | 28.4                              | 24.0                              | 11.6                              | 6.1                               | 6.9                               | 5.4                                            | 7.9                                            |
|                                       | %RSD                                  | 2.5                                           | 15.5                                          | 21.4                              | 20.0                              | 10.3                              | 7.0                               | 8.3                               | 4.7                                            | 7.3                                            |
| 50                                    | 1                                     | 207.6                                         | 229.3                                         | 117.5                             | 107.5                             | 109.1                             | 58.9                              | 59.0                              | 106.3                                          | 111.1                                          |
|                                       | 2                                     | 115.4                                         | 109.8                                         | 118.5                             | 102.1                             | 99.4                              | 92.7                              | 88.3                              | 102.7                                          | 94.8                                           |
|                                       | 3                                     | 73.6                                          | 72.4                                          | 91.8                              | 82.9                              | 82.0                              | 85.6                              | 83.9                              | 88.9                                           | 85.1                                           |
|                                       | Mean                                  | 132.2                                         | 137.2                                         | 109.3                             | 97.5                              | 96.8                              | 79.1                              | 77.1                              | 99.3                                           | 97.0                                           |
|                                       | SD                                    | 56.0                                          | 66.9                                          | 12.4                              | 10.6                              | 11.2                              | 14.5                              | 12.9                              | 7.5                                            | 10.7                                           |
|                                       | %RSD                                  | 42.3                                          | 48.8                                          | 11.3                              | 10.9                              | 11.6                              | 18.4                              | 16.7                              | 7.6                                            | 11.1                                           |
| 75                                    | 1                                     | 119.7                                         | 112.3                                         | 108.1                             | 98.2                              | 108.9                             | 94.7                              | 90.9                              | 98.9                                           | 102.6                                          |
|                                       | 2                                     | 113.6                                         | 101.6                                         | 97.2                              | 88.7                              | 90.8                              | 89.2                              | 85.8                              | 91.0                                           | 91.4                                           |
|                                       | 3                                     | 107.3                                         | 115.4                                         | 90.9                              | 91.6                              | 90.8                              | 92.2                              | 94.8                              | 109.5                                          | 92.1                                           |
|                                       | Mean                                  | 113.5                                         | 109.8                                         | 98.7                              | 92.8                              | 96.8                              | 92.0                              | 90.5                              | 99.8                                           | 95.4                                           |
|                                       | SD                                    | 5.1                                           | 5.9                                           | 7.1                               | 4.0                               | 8.5                               | 2.3                               | 3.7                               | 7.6                                            | 5.1                                            |
|                                       | %RSD                                  | 4.5                                           | 5.4                                           | 7.2                               | 4.3                               | 8.8                               | 2.5                               | 4.1                               | 7.6                                            | 5.4                                            |

\* See the article for details of subtraction of chloroform interference.
